**Title:** Normative age modelling of cortical thickness in autistic males

**Authors:** *Bethlehem, R.A.I.*<sup>1,2,±</sup>, *Seidlitz, J.*<sup>1,3</sup>, *Romero-Garcia, R.*<sup>1</sup>, *Dumas, G.*<sup>4,5,6</sup> & *Lombardo, M.V.*<sup>1,2,7</sup>

**Affiliations:**

<sup>1</sup>Department of Psychiatry, University of Cambridge, Cambridge CB2 0SZ, United Kingdom

<sup>2</sup>Autism Research Centre, Department of Psychiatry, University of Cambridge, Cambridge CB2 8AH, United Kingdom

<sup>3</sup>Developmental Neurogenomics Unit, National Institute of Mental Health, Bethesda, MD 20892, USA

<sup>4</sup>Institut Pasteur, Human Genetics and Cognitive Functions Unit, Paris, France

<sup>5</sup>CNRS UMR3571 Genes, Synapses and Cognition, Institut Pasteur, Paris, France

<sup>6</sup>University Paris Diderot, Sorbonne Paris Cité, Human Genetics and Cognitive Functions, Paris, France

<sup>7</sup>Department of Psychology, Center for Applied Neuroscience, University of Cyprus, Nicosia, Cyprus

± Corresponding author:

Dr. Richard A.I. Bethlehem

Department of Psychiatry

Douglas House

18B Trumpington Road

CB5 8AH Cambridge

United Kingdom

[rb643@medschl.cam.ac.uk](mailto:rb643@medschl.cam.ac.uk)

Words:

Figures:

Tables:

## Abstract

Understanding heterogeneity in neural phenotypes is an important goal on the path to precision medicine for autism spectrum disorders (ASD). Age is a critically important variable in normal structural brain development and examining structural features with respect to age-related norms could help to explain ASD heterogeneity in neural phenotypes. Here we examined how cortical thickness (CT) in ASD can be parameterized as an individualized metric of deviance relative to typically-developing (TD) age-related norms. Across a large sample (n=870 per group) and wide age range (5-40 years), we applied a normative modelling approach that provides individualized whole-brain maps of age-related CT deviance in ASD. This approach isolates a subgroup of ASD individuals with highly age-deviant CT. The median prevalence of this ASD subgroup across all brain regions is 7.6%, and can reach as high as 10% for some brain regions. Testing age-normed CT scores also highlights on-average differentiation, and associations with behavioural symptomatology that is separate from insights gleaned from traditional case-control approaches. This work showcases a novel individualized approach for understanding ASD heterogeneity that could potentially further prioritize work on a subset of individuals with significant cortical pathophysiology represented in age-related CT deviance. Rather than cortical thickness pathology being widespread characteristic of most ASD patients, only a small subset of ASD individuals are actually highly deviant relative to age-norms. These individuals drive a large majority of small effect results from canonical case-control comparisons and should be prioritized in future research to better understand the mechanisms behind highly deviant CT patterns.

## Introduction

Autism spectrum disorder (ASD) is a clinical behavioural consensus label we give to a diverse collection of patients with social-communication difficulties and pronounced repetitive, restricted, and stereotyped behaviours (Lai et al., 2014). Beyond the single label of ASD, patients are in fact widely heterogeneous in phenotype, but also with regards to the diversity of different aetiologies (Lombardo et al., 2018). Even within mesoscopic levels of analysis such as examining brain endophenotypes, heterogeneity is the rule rather than the exception (Ecker, 2016). At the level of structural brain variation, neuroimaging studies have identified various neuroanatomical features that might help identify individuals with autism or reveal elements of a common underlying biology (Ecker, 2016). However, the vast neuroimaging literature is also considerably inconsistent, with reports of hypo- or hyper-connectivity, cortical thinning versus increased grey or white matter, brain overgrowth, arrested growth, etc., leaving stunted progress towards understanding mechanisms driving cortical pathophysiology in ASD.

Multiple explanations could be behind this inconsistency across the literature. Methodology widely differs across studies (e.g., low statistical power, different ways of estimating morphology or volume) and is likely a very important factor (Haar et al., 2016; Vissers et al., 2012). Initiatives such as the Autism Brain Imaging Data Exchange (ABIDE; Di Martino et al., 2014) have made it possible to significantly boost sample size by pooling together data from several different studies. However, within-group heterogeneity in the autism population also immediately stands out as another factor obscuring consistency in the literature, particularly when the dominant approach of case-control models largely ignores heterogeneity within the ASD population. In particular, some autism-related heterogeneity reported in literature might be explained by factors such as age (Georgiades et al., 2017; Lord et al., 2015). Indeed, with regards to structural brain features of interest for study in ASD (e.g., volume, cortical thickness, surface area), these features change markedly over development (Mills et al., 2016; Raznahan et al., 2011a, 2011b; Smith et al., 2016). However, typical approaches towards dealing with age revolve around group statistical modelling of age as the variable of interest or removing age as a covariate and then parametrically modelling on-average differences between cases versus controls. While these are common approaches in the literature, they do not immediately provide individualized estimates of age-related deviance. In contrast, normative models of age-related variation may likely be an important alternative to these approaches and may mesh better with some conceptual views of deviance in ASD as being an extreme of typical population norms (Marquand et al., 2016). In contrast to the canonical case-control model, normative age modelling allows for computation of

individualized metrics that can hone in on the precision information we are interested in – that is, deviance expressed in specific ASD individuals relative to non-ASD norms. Such an approach may be a fruitful way forward in isolating individuals whom are ‘statistical outliers’. The reasons behind why these individuals are outliers relative to non-ASD norms may be of potential clinical and/or mechanistic importance. Indeed, if we are to move forward towards stratified psychiatry and precision medicine for ASD (Kapur et al., 2012), we must go beyond case-control approaches and employ dimensional approaches that can tell us information about which individuals are atypical and how or why they express such atypicality.

In the present study, we employ normative modelling on age-related variability as a means to individualize our approach to isolate specific subsets of patients with very different neural features. Here we focus specifically on a neural feature of cortical morphology known as cortical thickness (CT). CT is a well-studied neuroanatomical feature thought to be differentially affected in autism and has received increasing attention in recent years (Jiao et al., 2011; Khundrakpam et al., 2017; Moradi et al., 2017; Smith et al., 2016; van Rooij et al., 2017; Zielinski et al., 2014). Recent work from our group also identified a genetic correlate for autism specific CT variation despite considerable heterogeneity in group specific CT in children with autism (Romero-Garcia, Warrier, Bullmore, Baron-Cohen, & Bethlehem, in press). A study examining ABIDE I cohort data discovered case-control differences in CT, albeit very small in effect size (Haar et al., 2014). Similarly, the most recent and largest study to date, a mega-analysis combining data from ABIDE and the ENIGMA consortium, also indicated very small on-average case-control differences in cortical thickness restricted predominantly to areas of frontal and temporal cortices, and indicate very subtle age-related between-group differences and substantial within-group age-related variability (van Rooij et al., 2017). Overall, these studies emphasize two general points of importance. First, age or developmental trajectory is extremely important (Courchesne et al., 2011, 2007; Georgiades et al., 2017; Schumann et al., 2010). Second, given the considerable within-group age-related variability and the presence of a large majority of null and/or very small between-group effects, rather than attempting to find on-average differences between all cases versus all controls, we should shift our focus to capitalize on this dimension of large age-related variability and isolate autism cases that are at the extremes of this dimension of normative variability.

Given our novel approach of age-related normative CT modelling, we first compare the utility of age-related normative modelling directly against case-control models. We then describe the prevalence of ASD cases that show significant age-related deviance in CT (i.e. > 2 SD from age-related norms) and show how a metric of continuous variability in age-related

deviance in CT is expressed across the cortex in autism. Finally, we identify age-deviant CT-behaviour associations and assess whether such dimensional analyses associated with behaviour identify similar or different regions than typical case-control analyses. To show applicability of this approach we also applied the same method to other measures of neuroanatomy; gyrification, volume and surface area. Results and analyses of these metrics can be found in the supplementary materials and all code and data used are available on GitHub (Bethlehem et al. 2018).

## Methods

### Participants

In this study, we first sought to leverage large neuroimaging datasets to yield greater statistical power for identifying subtle effects. To achieve this, we utilized the ABIDE datasets (ABIDE I and II) (see Supplementary Table S1 and S2 for full list of sites used in the current analyses). Given that the normalized modelling approach gives us individual level measures we chose to also include sites with limited numbers of subjects. Groups were subsequently matched on age using the non-parametric nearest neighbour matching procedure implemented in the MatchIt package in R (<https://cran.r-project.org/web/packages/MatchIt/index.html>) (Ho et al., 2007). After matching case and control groups and excluding scans of poorer quality (see supplementary materials) we were left with a sample size  $N=870$  per group (Table 1 and 2). Because of power limitations in past work with small samples, we conducted an a priori statistical power analysis indicating that a minimum case-control effect size of  $d = 0.1752$  could be detected at this sample size with 80% power at a conservative alpha set to 0.005 (Benjamin et al., 2017). For correlational analyses looking at brain-behaviour associations, we examined a subset of patients with the data from the SRS ( $N_{autism\_male} = 421$ ) and ADOS total scores ( $N_{autism\_male} = 505$ ). With same power and alpha levels the minimum effect for SRS is  $r = 0.1765$  and  $r = 0.1651$  for the ADOS.

**Table 1:** Sample characteristics of Age

| Dx     | Sex    | Mean  | SD   | N   | Median |
|--------|--------|-------|------|-----|--------|
| Autism | Male   | 16.32 | 9.09 | 754 | 13.75  |
| Autism | Female | 15.06 | 8.43 | 116 | 12.57  |
| NT     | Male   | 16.64 | 8.98 | 660 | 13.69  |
| NT     | Female | 13.25 | 5.33 | 210 | 11.09  |

**Table 2:** Sample characteristics

| Measure | Dx      | Sex    | Mean   | SD    | N   | Median |
|---------|---------|--------|--------|-------|-----|--------|
| IQ      | Autism  | Male   | 106.13 | 16.51 | 754 | 107    |
|         | Autism  | Female | 105.88 | 16.21 | 116 | 106.5  |
|         | NT      | Male   | 111.28 | 12.13 | 660 | 111    |
|         | NT      | Female | 112.07 | 13.21 | 210 | 112    |
| ADOS    | Autism  | Male   | 11.15  | 3.86  | 505 | 11     |
|         | Autism  | Female | 11.41  | 3.9   | 63  | 11     |
|         | Control | Male   | 1.55   | 1.58  | 38  | 1      |
|         | Control | Female | 3      | 1.05  | 10  | 3      |
| SRS     | Autism  | Male   | 80.42  | 21.41 | 421 | 77     |
|         | Autism  | Female | 85.95  | 22.07 | 61  | 88     |
|         | Control | Male   | 38.43  | 15.25 | 337 | 41     |
|         | Control | Female | 39.93  | 12.13 | 120 | 42     |

## Imaging processing and quantification

Cortical surface reconstruction was performed using the MPRAGE (T1) image of each participant with FreeSurfer (<http://surfer.nmr.mgh.harvard.edu/>) version (v5.3.0, to ensure comparability with previous ABIDE publications). The reconstruction pipeline performed by FreeSurfer “recon-all” involved intensity normalization, registration to Talairach space, skull stripping WM segmentation, tessellation of the WM boundary, and automatic correction of topological defects. Briefly, non-uniformity intensity correction algorithms were applied before skull stripping (Ségonne et al., 2004), resulting in resampled isotropic images of 1mm. An initial segmentation of the white matter tissue was performed to generate a tessellated representation of the WM/GM boundary. The resulting surface is deformed outwards to the volume that maximize the intensity contrast between GM and cerebrospinal fluid, generating the pial surface (Dale et al., 1999). Resulting surfaces were constrained to a spherical topology and corrected for geometrical and topological abnormalities. Cortical thickness of each vertex was defined as the shortest distance between vertices of the GM/WM boundary and the pial surface (Fischl and Dale, 2000). We chose to not conduct manual segmentations and excluded failed subjects from any subsequent analysis (and these subjects were removed prior to the matching and QC procedures). To assess quality of FreeSurfer reconstructions we computed the Euler index (Rosen et al., 2018). The Euler number is a quantitative index of segmentation quality and has shown high overlap with

manual quality control labelling (Rosen et al., 2018). We chose to exclude subjects with a Euler index of 300 or higher in either hemisphere (corresponding to approximately the top 10%) and included the index as a confound variable in all models.

Across both ABIDE I and ABIDE II cortical thickness was extracted for each subject using two different parcellations schemes: an approximately equally-sized parcellation of 308 regions (~500mm<sup>2</sup> each parcel) (Bethlehem et al., 2017; Whitaker et al., 2016) and a parcellation of 360 regions derived from multi-modal features extracted from the Human Connectome Project (HCP) dataset (Glasser et al., 2016). The 308-region parcellation was constructed in the FreeSurfer fsaverage template by subdividing the 68 regions defined in the Desikan-Killiany atlas (Desikan et al., 2006). Thus, each of the 68 regions was sequentially sub-parcellated by a backtracking algorithm into regions of ~500mm<sup>2</sup>, resulting in a high resolution parcellation that preserved the original anatomical boundaries defined in the original atlas (Romero-garcia et al., 2012). Surface reconstructions of each individual were co-registered to the fsaverage subject. The inverse transformation was used to map both parcellation schemes into the native space of each participant.

## Statistical analyses

There are likely many variables that contribute to variability in CT between individuals and across the brain. In order to visually assess the contribution of some prominent sources of variance we adopted a visualization framework derived from gene expression analysis (<http://bioconductor.org/packages/variancePartition>) (Hoffman and Schadt, 2016) and included the most commonly available covariates in the ABIDE dataset: Age, Sex, Diagnosis, Scanner Site, Full-scale IQ, Verbal IQ, Handedness and SRS. Given that ABIDE was not designed as an integrated dataset from the outset, it seems plausible that scanner site might be related to autism or autism-related variables (e.g., some sites might have different case-control ratios or only recruited specific subgroups). Figure 1 shows the ranked contribution of those covariates. Perhaps unsurprisingly, scanner site and age proved to be the most dominant sources of variance (each explaining on average around 15% of the total variance). Our initial conventional analysis was aimed to delineate potential broad case-control differences, as has been done in previous studies (Haar et al., 2016; van Rooij et al., 2017). We used a linear mixed effects model with scanner site as random effect. Given the potentially strong contribution of age chose to include this as fixed effects covariates in the model. Multiple comparison correction was implemented with Benjamini-Hochberg FDR at  $q < 0.05$  (Benjamini and Hochberg, 1995).

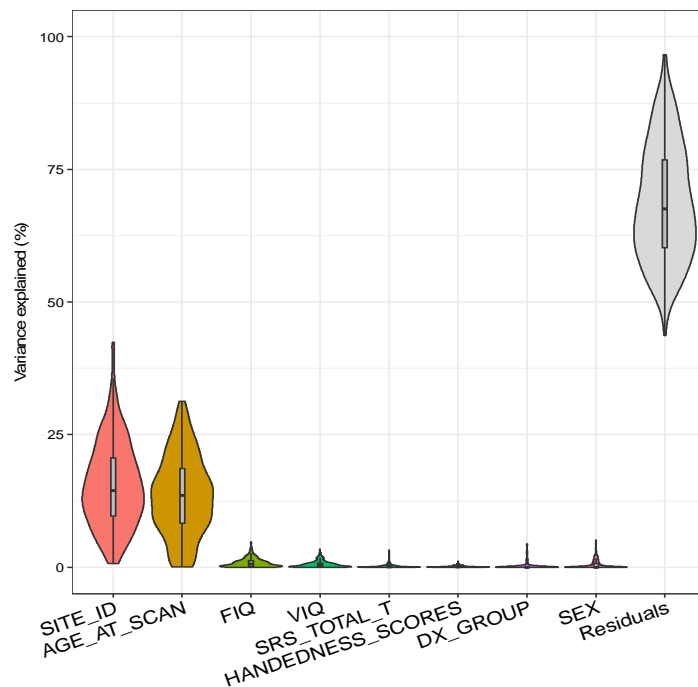

**Figure 1:** Explained variance in cortical thickness for each covariate.

## Age-related normative modelling

Normative modelling of age-related CT effects was done utilizing data from the typically-developing group (TD) (see Figure 2 for a schematic overview). We used a local polynomial regression fitting procedure (LOESS) (Cleveland et al., 1988), where the local width or smoothing kernel of the regression was determined by the model that provided the overall smallest sum of squared errors. To align the TD and ASD groups, both were binned into one year age bins. For each age bin and every brain region we computed a normative mean and standard deviation from the TD group. This was done separately for each sex, given known sex differential developmental trajectories. These statistical norms were then used to compute a w-score (analogous to a z-score) for every individual with autism. The w-score for an individual reflects how far away their CT is from TD norms in units of standard deviation. Because w-scores are computed for every brain region, we get a w-score map for each ASD participant showing how each brain region for that individual is atypical relative to TD norms. Age bins that contained fewer than 2 data-points in the TD group were excluded from subsequent analysis as the standard deviations for these bins would essentially be zero (and thus the w-score could not be computed).

To assess the reliability of this w-score we bootstrapped the normative sample (1000 bootstraps, with replacement) and computed 1000 bootstrapped w-scores for each individual and each brain region. To subsequently quantify the reliability of the w-score we computed



an FDR corrected analogous p-value for each subject by computing the absolute position of the real w-score in the distribution of bootstrapped w-scores. The rationale being that if a real w-score would be in the top 5% of the bootstrapped distribution it would likely not be a reliable score (e.g. the score would be influenced by only a small subset of the normative data). The median number of brain regions per subject with a significant p-value was 1 (out of 308), indicating that the w-score provides a robust measure of atypicality. More details on the bootstrapping procedure are provided in the supplementary material.

Because w-score maps are computed for each individual, we ran hypothesis tests at each brain region to identify regions that show on-average non-zero w-scores stratified by sex (FDR corrected at  $q < 0.05$ ). To assess the effect of age-related individual outliers on the global case-control differences we re-ran the hypotheses tests on w-scores after removing region-wise individual outliers (based on a 2SD cut-off). Unfortunately, despite a significant female sub-group, the age-wise binning greatly reduced the number of bins with enough data-points in the female group. Given the reduced sample size in the female group and the known interaction between autism and biological sex (Lai et al., 2015), we conducted normative modelling on the male group only.

To assess the distribution in the normative group we also conducted one-sample linear mixed effects modelling in the normative group only to determine if any if all brain regions would show outlier consistency. There were no brain regions (neither corrected nor uncorrected) for which the w-score showed a deviation significant from zero.

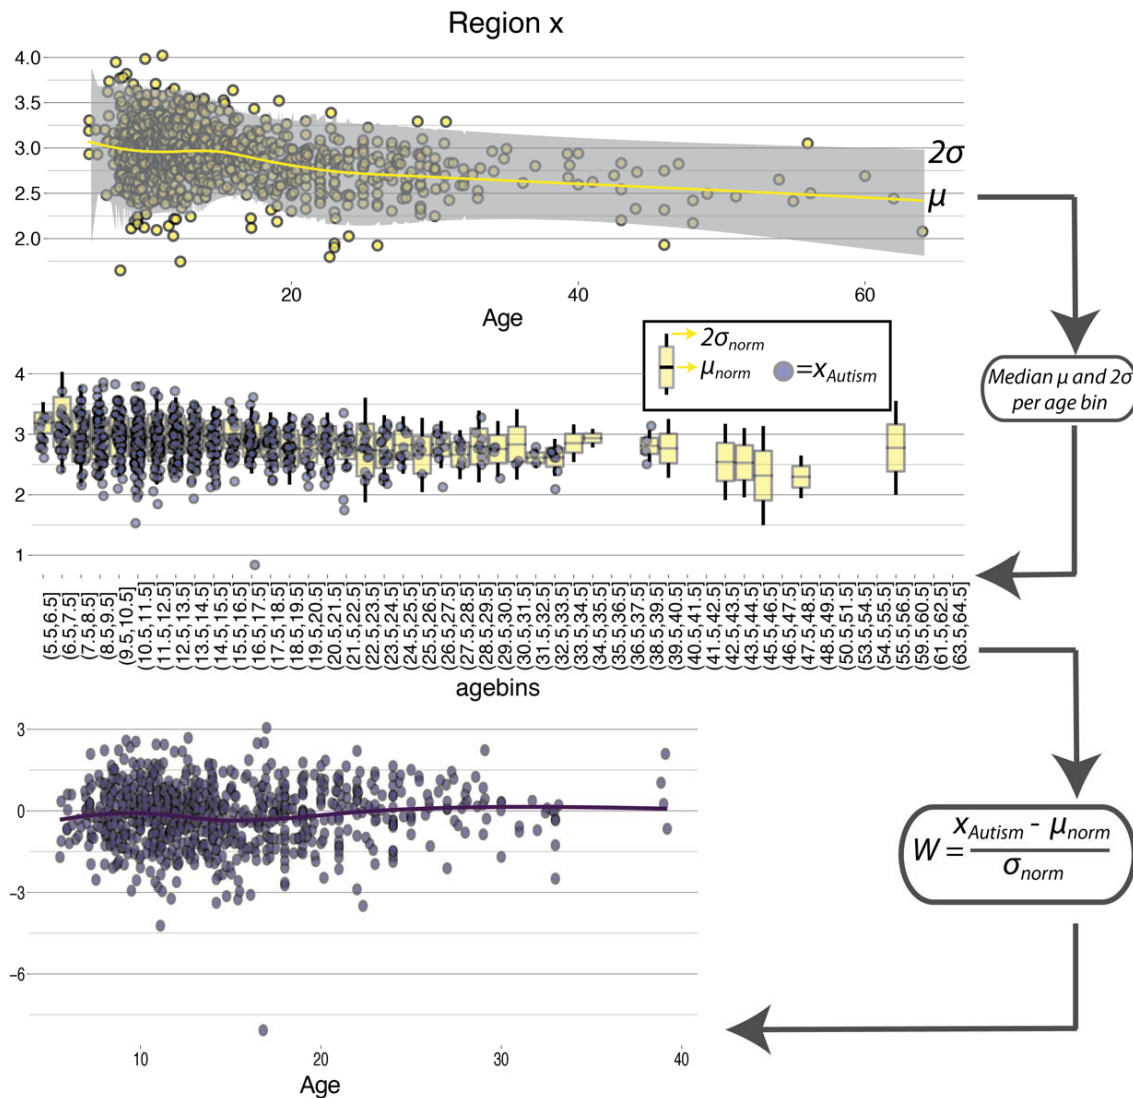

**Figure 2:** Schematic overview of normative modelling. In first instance LOESS regression is used to estimate the developmental trajectory on CT for every individual brain region to obtain an age specific mean and standard deviation. Then we computed median for each one-year age-bin for these mean and median neurotypical estimates to align them with the ASD group. Next, for each individual with autism and each brain region the normative mean and standard deviation are used to compute a w-score relative to their neurotypical age-bin. Contrary to conventional boxplots, the second panel shows mean, 1sd and 2sd for the neurotypical group (in yellow) and individuals with an autism diagnosis in purple.

To isolate subsets of individuals with significant age-related CT deviance, we used a cut-off score of 2 standard deviations (i.e.  $w \geq 2$  or  $w \leq -2$ ). This cut-off allows us to isolate specific ASD patients with markedly abnormal CT relative to age-norms for each individual brain region. We then calculated sample prevalence (percentage of all ASD patients with atypical w-scores), in order to describe how frequent such individuals are in the ASD population and for each brain region individually. A sample prevalence map can then be computed to show the frequency of these patients across each brain region. We also wanted to assess how

many patients have markedly atypical w-scores (beyond 2SD) across a majority of brain regions. This was achieved by computing an individual global w-score ratio as follows:

$$gW = \frac{\sum abs(w) > 2}{\sum abs(w) < 2}$$

We also computed global w-score ratios for positive and negative w regions separately.

## Bootstrap analysis

To assess the reliability of the individual w-scores we also ran a bootstrapping analysis by randomly sampling (1000 resamples with replacement) from the normative population and recomputing the w-scores. Resulting in 1000 bootstrapped sample for every individual and every brain region. To determine reliability, we computed p-values for the real w-scores against the bootstrapped w-score. The median number of brain regions per subject that differ significantly in the bootstrap analysis was 1. This suggest that the obtained w-score was highly consistent across bootstraps. See supplementary materials for more details.

## Exploratory analyses

In addition to assessing the effect of normative outlier on conventional case-control analyses we also conducted some exploratory analysis on the normative w-scores. First, to explore whether the w-scores reflect a potentially meaningful phenotypic feature we also computed Spearman correlations for each brain region between the most commonly shared phenotypic features in ABIDE: ADOS, SRS, SCQ, AQ, FIQ and Age. Resulting p-values matrices were corrected for multiple comparisons using Benjamini-Hochberg FDR correction and only regions surviving and FDR corrected p-value of  $p < 0.05$  are reported. Details of this exploratory analysis are reported in the supplementary materials.

Finally, we explored whether the raw CT values could be used in a multivariate fashion to separate groups by diagnosis or illuminate stratification within ASD into subgroups. Here we used k-medoid clustering on t-Distributed Stochastic Neighbour Embedding (tSNE) (Maaten, 2014). Barnes-Hut tSNE was used to construct a 2-dimensional embedding for all parcels in order to be able to run k-medoid clustering in a 2D representation and in order to visually assess the most likely scenario within the framework suggested by Marquand and colleagues (Marquand et al., 2016). Next, we performed partitioning around medoids (PAM), estimating the optimum number of clusters using the optimum average silhouette width

(Hennig and Liao, 2013). Details of this exploratory analysis are reported in the supplementary materials.

## Data and code availability

Data and code are available on GitHub (Bethlehem et al. 2018; <http://doi.org/10.5281/zenodo.1158023>), Cohen's  $d$  were computed using: [https://github.com/mvlombardo/utills/blob/master/cohens\\_d.R](https://github.com/mvlombardo/utills/blob/master/cohens_d.R)

## Results

### Case-control differences versus age-related normative modelling

Our first analysis examined conventional case-control differences. As expected from prior papers utilizing large-scale datasets for case-control analysis (e.g., (Haar et al., 2016; van Rooij et al., 2017)), a small subset of regions (12%, 38/308 regions) pass FDR correction. Of these regions, most are of small effect size, with 34 of the detected 38 regions showing an effect less than 0.2 standard deviations of difference (Figure 3A). We suspected that such small effects could be largely driven by a few ASD patients (Byrge et al., 2015) with highly age-deviant CT. Because we also had computed  $w$ -scores from our normative age-modelling approach, we identified specific 'statistical outlier' patients for each individual region with  $w$ -scores  $> 2$  standard deviations from typical norms and excluded them from the case-control analysis. This analysis guards against the influence of these extreme outliers, and if there are true on-average differences in ASD, the removal of these outlier patient\*regions should have little effect on our ability to detect case-control differences. However, rather than continuing to identify 38 regions with small case-control differences, removal of outlier patients now only revealed 16 regions passing FDR correction - a 2.3-fold decrease in the number of regions detected. Indeed, the majority of case-control differences identifying small on-average effects were primarily driven by this small subset of highly-deviant patients (Figure 3B). These remaining 16 regions with small on-average effects were restricted to areas near posterior cingulate cortex, temporo-parietal cortex and areas of visual cortex.

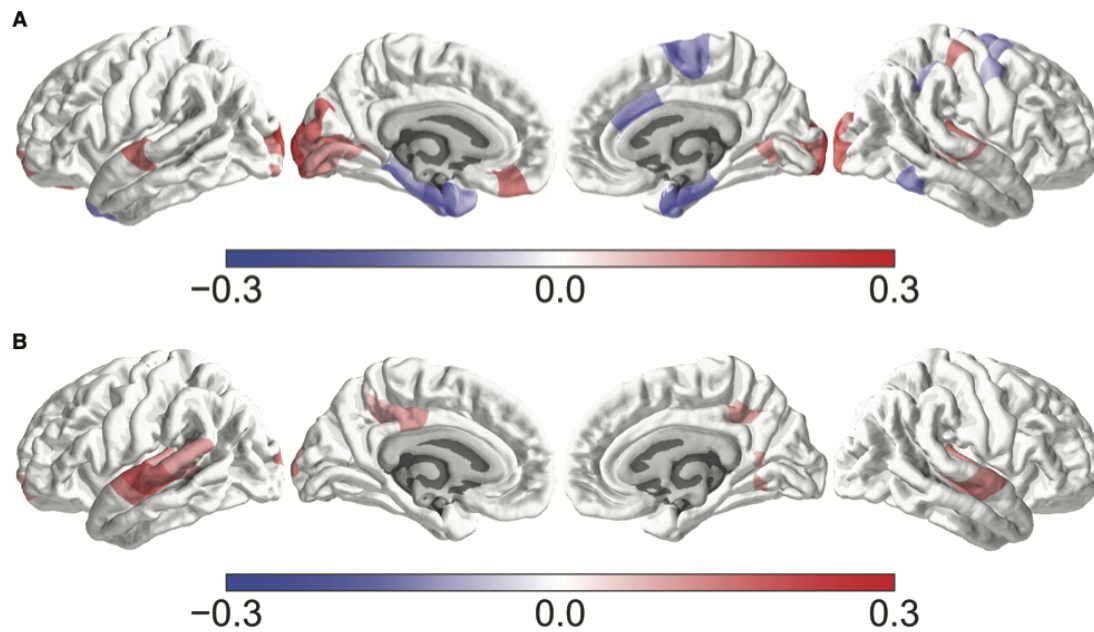

**Figure 3:** Panel A shows effect sizes for regions passing FDR correction for linear mixed effect modelling of conventional case control difference analysis. Cohen's d values represent ASD – Control, thus blue denotes ASD<Control and red denotes ASD>Control. Panel B shows effect sizes for regions passing FDR correction after outlier removal for the same linear mixed effect modelling of conventional case control difference analysis.

In contrast to a canonical case-control model, we computed normative models of age which resulted in individualized w-scores that indicate how deviant CT is for an individual compared to typical norms for that age. This modelling approach allows for computation of w-scores for every region and in every patient, thus resulting in a w-score map that can then itself be tested for differences from a null hypothesis of w-score = 0, indicating no significant on-average ASD deviance in age-normed CT. These hypothesis tests on normative w-score maps revealed no regions surviving FDR correction.

### Isolating ASD individuals with significant age-related CT deviance

While the normative modelling approach can be sensitive to different pathology than traditional case-control models, another strength of the approach is the ability to isolate individuals expressing highly significant CT-deviance. We operationalized 'significant' deviance in statistical terms as w-scores greater than 2SD away from TD norms. By applying this cut-off, we can then describe what proportion of the ASD population falls into this CT subgroup category for each individual brain region. Over all brain regions the median prevalence of these patients is around 7.6% (Figure 4). Meaning that in each brain region there are approximately 7.6% of individuals that would be considered an outlier. This

prevalence estimation is much higher than the expected 4.55% prevalence one would expect by chance for greater than 2 standard deviations of difference. The distribution of prevalence across brain regions also has a positive tail indicating that for a small number of brain regions the prevalence can jump up to more than 10%. Expressed back into sample size numbers, if 10% of the ASD population had significant CT abnormalities, with a sample size of  $n=754$ , this means that  $n=75$  patients possess such significant issues. Underscoring the prevalence of these significant cases is important since as shown earlier, it is likely that primarily these 'statistical outlier' patients drive most of the tiny case-control differences observed.

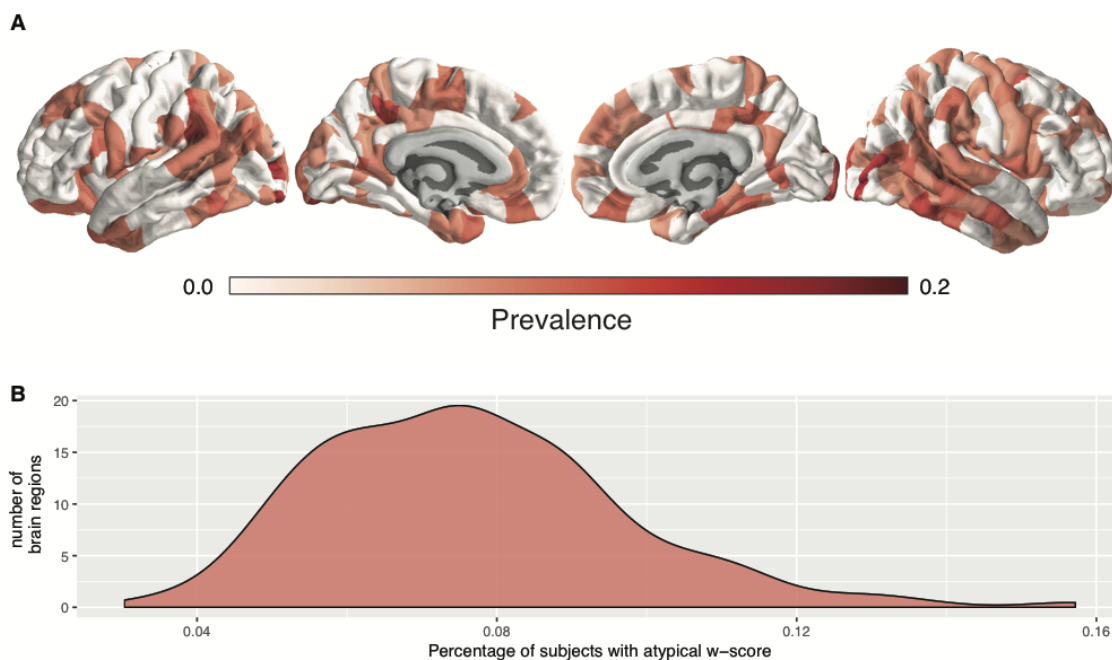

**Figure 4:** Region specific prevalence of atypical w-scores. Panel A shows the by region prevalence of individuals with a w-score of greater than  $\pm 2SD$ . For visualization purposes these images are thresholded at the median prevalence of 0.076. Panel B shows the overall distribution of prevalence across all brain regions.

There are other interesting attributes about this subset of brain regions. With regard to age, these patients were almost always in the age range of 6-20, and were much less prevalent beyond age 20 (S5). The median age of outliers across brain regions ranged from [10.6 – 20.2] years old, with an overall skewed distribution towards the younger end of the spectrum (supplementary Figure S6), showing that CT deviance potentially normalizes with increasing age in ASD, though it should be noted that this may partially be explained by the overall skewed age distribution in the overall dataset.

Patients with significant CT deviance were also largely those that expressed such deviance within specific brain regions and were not primarily subjects with globally deviant CT. To

show this we computed a w-score ratio across brain regions that helps us isolate patients that show globally atypical CT deviance across most brain regions. The small number of patients with a ratio indicating a global difference (ratio > 0.5, n=14) were those that had globally thinner cortices. This small subset of individuals was much smaller than the number of region-wise outliers as shown in Figure 4. Upon visual inspection of the raw data for these participants, it is clear that the global thinning effect is not likely a true biological difference but rather one likely driven by quality of the raw images, even though the Euler index did not indicate failure in reconstruction. Unfortunately, we did not have enough complete phenotypic data on these subjects to warrant further in-depth phenotypic analysis.

## Discussion

In the present study, we find that with a highly-powered dataset, conventional analyses reveal small case-control differences in cortical thickness in autism restricted to a small subset of regions. In general, this idea about subtle effect sizes for case-control comparisons is compatible with other recent papers utilizing partially overlapping data — Haar and colleagues utilized only ABIDE I data (Haar et al., 2016), while van Rooji and colleagues (van Rooij et al., 2017) utilized both ABIDE I and II dataset combined with further data from the ENIGMA consortium. While these statements about small effect sizes are not novel, we contribute a novel idea here in our findings that suggest that even these small effect sizes may be misleading and over-optimistic. Utilizing normative modelling as a way of identifying and removing CT-deviant outlier patients, we find here that most small case-control differences are driven by a small subgroup of patients with highly CT-deviance for their age. In contrast, we further showed that analysis of CT-normed scores (i.e. w-scores) themselves reveals a completely different set of regions that are on-average atypical in ASD. The directionality of such differences also reverses in some cases. For instance, Haar and colleagues discovered that areas of visual cortex are thicker in ASD compared to TD in ABIDE I (Haar et al., 2016). Our case-control analyses here largely mirror that finding. However, re-analysis after w-score outlier removal totally removes the effects previously reported in visual cortex. Thus, here is a clear case whereby our novel normative age modelling approach identifies effects that are likely driven by only a small subset of individuals.

The revelation of new insights via normative age modelling, alongside cleaning up interpretations behind case-control models, both highlight the significant utility of such a novel approach. The presence of small region dependent outlier effects in ASD misleadingly drives on-average inferences from case-control models. Thus, it is important for the field to

better understand how prevalent this ‘subgroup’ is for a given brain region (i.e. our analyses did not reveal a consistent brain region or group of individuals with spatially overlapping patterns of extreme w-scores). With our normative modelling approach, we were able to quantify the overall prevalence of this CT outlier ‘subgroup’ at a median prevalence of 7.6% (meaning that for each brain region there was a median of 7.6% of individuals who had an extreme w-score in that region) when taking into account all brain regions – an estimate much larger than the expected 4.55% for standard deviations greater than 2. However, there is some heterogeneity across brain regions, as a small proportion of brain regions are even more enriched in this subgroup and can contain greater than 10% prevalence.

We also noted that this small subgroup showing highly age-atypical CT was predominantly restricted to the childhood to early adult age range. In later adult ages, the prevalence of this subgroup drops off. This could be a potential indicator that highly atypical CT is more prevalent and detectable at earlier ages. It will be important to assess even earlier age ranges such as the first years of life (Courchesne et al., 2011), as well as later adult years when significant aging processes begin to take effect (Happé and Charlton, 2012). Again, it should be noted that this may partially be explained by the overall skewed age distribution in the overall dataset. Importantly though, the interpretations behind why this subgroup of patients is so atypical also needs to be addressed. Mirroring work in autism genetics, whereby discoveries are continually being made regarding very small proportions of the ASD population being explained by highly penetrant genetic mechanisms (Geschwind and State, 2015), it also may be the case that such individuals with highly age-deviant CT are individuals with specific highly penetrant biological mechanisms underlying them, and possibly related to neurogenesis and other factors that are implicated in CT changes (Romero-Garcia et al., 2018). With animal models of highly penetrant genetic mechanisms linked to autism, it is notable that such mechanisms have heterogeneous effects on brain volume (Ellegood et al., 2014). Thus, it will be important for future work to parse apart explanations behind why such a small subset of individuals appear to have such highly age-deviant CT features.

Finally, there are a number of caveats to consider in the present study. First and foremost, the present data are cross-sectional and the normative age modelling approach cannot make claims about trajectories at an individual level. With longitudinal data, this normative modelling approach could be extended. However, at the moment the classifications of highly age-deviant CT individuals are limited to static normative statistics within discrete age-bins rather than based on statistics from robust normative trajectories. The dataset also represents ASD within an age range that misses very early developmental and also very late



adulthood periods. The dataset also presents a post-hoc collection of sites accumulated through the ABIDE initiative, whereby scanners, imaging acquisition sequences and parameters, sample ascertainment, etc, are highly heterogeneous. As a result, we observed that site had a large effect on explaining variance in CT and this is compatible with observations made by other studies (Haar et al., 2016). Furthermore, it is likely that there may be systematic interactions between scanner site and some variables of interest such as age (e.g. different scanning sites will likely have recruited specific age cohorts). Future work with more homogenous imaging sequences, scanner hardware, etc, that bolster multi-site combination of data is warranted in order to reduce this pronounced site related issue (Charman et al., 2017; Loth et al., 2017).

In conclusion, the present study showcases a novel normative age modelling approach in ASD and one that can significantly impact the interpretation of conventional case-control modelling, but which can also shed significant new insight into heterogeneity in ASD. We show that results from case-control analyses, even within large datasets, can be highly susceptible to the influence of 'outlier' subjects. Removing these outlier subjects from analyses can considerably clean up the inferences being made about on-average differences that apply to a majority of the ASD population. Rather than only being nuisances for standard group-level analyses, these outlier patients are significant in their own light, and can be identified with our normative age modelling approach. Normative models may provide an alternative to case-control models that test hypotheses at a group-level, by allowing additional insight to be made at more individualized levels, and thus help further progress towards precision medicine for ASD.

## Acknowledgments

This work was supported by a European Research Council (ERC) Starting Grant (755816; AUTISMS) awarded to MVL. RRG was funded by the Guarantors of Brain. JS was funded by the National Institutes of Health Oxford-Cambridge Scholars Program. RAIB was funded by the Medical Research Council and Autism Research Trust.

## Author Contributions

RAIB, RRG, JS and MVL designed the experiment. RAIB, RRG, JS and MVL conceived and implemented all analyses. RAIB, RRG, JS, GD and MVL wrote the manuscript.

## Financial Disclosures

None of the authors have any financial interests to declare.

## References

- Benjamin, D.J., Berger, J.O., Johannesson, M., Nosek, B.A., Wagenmakers, E.-J., Berk, R., Bollen, K.A., Brembs, B., Brown, L., Camerer, C., Cesarini, D., Chambers, C.D., Clyde, M., Cook, T.D., De Boeck, P., Dienes, Z., Dreber, A., Easwaran, K., Efferson, C., Fehr, E., Fidler, F., Field, A.P., Forster, M., George, E.I., Gonzalez, R., Goodman, S., Green, E., Green, D.P., Greenwald, A.G., Hadfield, J.D., Hedges, L. V., Held, L., Hua Ho, T., Hoijtink, H., Hruschka, D.J., Imai, K., Imbens, G., Ioannidis, J.P.A., Jeon, M., Jones, J.H., Kirchler, M., Laibson, D.I., List, J., Little, R., Lupia, A., Machery, E., Maxwell, S.E., McCarthy, M., Moore, D.A., Morgan, S.L., Munafó, M., Nakagawa, S., Nyhan, B., Parker, T.H., Pericchi, L., Perugini, M., Rouder, J., Rousseau, J., Savalei, V., Schönbrodt, F.D., Sellke, T., Sinclair, B., Tingley, D., Van Zandt, T., Vazire, S., Watts, D.J., Winship, C., Wolpert, R.L., Xie, Y., Young, C., Zinman, J., Johnson, V.E., 2017. Redefine statistical significance. *Nat. Hum. Behav.* <https://doi.org/10.1038/s41562-017-0189-z>
- Benjamini, Y., Hochberg, Y., 1995. Controlling the False Discovery Rate: A Practical and Powerful Approach to Multiple Testing. *J. R. Stat. Soc. Ser. B* 57, 289–300.
- Bethlehem, R.A.I., Romero-Garcia, R., Mak, E., Bullmore, E.T., Baron-Cohen, S., 2017. Structural Covariance Networks in Children with Autism or ADHD. *Cereb. Cortex* 27, 4267–4276. <https://doi.org/10.1093/cercor/bhx135>
- Bethlehem, R.A.I., Seidlitz, J., Romero-Garcia, R., Dumas, G. & Lombardo, M.V.L., (2018, August 1). Normative age modelling of cortical thickness in autistic males (Version V2.1). Zenodo. <http://doi.org/10.5281/zenodo.1325171>
- Byrge, L., Dubois, J., Tyszka, J.M., Adolphs, R., Kennedy, D.P., 2015. Idiosyncratic Brain Activation Patterns Are Associated with Poor Social Comprehension in Autism. *J. Neurosci.* 35, 5837–5850. <https://doi.org/10.1523/JNEUROSCI.5182-14.2015>
- Charman, T., Loth, E., Tillmann, J., Crawley, D., Wooldridge, C., Goyard, D., Ahmad, J., Auyeung, B., Ambrosino, S., Banaschewski, T., Baron-Cohen, S., Baumeister, S., Beckmann, C., Bölte, S., Bourgeron, T., Bours, C., Brammer, M., Brandeis, D., Brogna, C., de Bruijn, Y., Chakrabarti, B., Cornelissen, I., Acqua, F.D., Dumas, G., Durston, S., Ecker, C., Faulkner, J., Frouin, V., Garcés, P., Ham, L., Hayward, H., Hipp, J., Holt, R.J., Isaksson, J., Johnson, M.H., Jones, E.J.H., Kundu, P., Lai, M.-C., D'ardhuy, X.L., Lombardo, M. V., Lythgoe, D.J., Mandl, R., Mason, L., Meyer-Lindenberg, A., Moessnang, C., Mueller, N., O'Dwyer, L., Oldehinkel, M., Oranje, B., Pandina, G., Persico, A.M., Ruggeri, B., Ruigrok, A.N. V., Sabet, J., Sacco, R., Cáceres, A.S.J., Simonoff, E., Toro, R., Tost, H., Waldman, J., Williams, S.C.R., Zwiers, M.P., Spooren, W., Murphy, D.G.M., Buitelaar, J.K., 2017. The EU-AIMS Longitudinal European Autism Project (LEAP): clinical characterisation. *Mol. Autism* 8, 27. <https://doi.org/10.1186/s13229-017-0145-9>
- Cleveland, W.S., Devlin, S.J., Grosse, E., 1988. Regression by local fitting. *J. Econom.* 37, 87–114. [https://doi.org/10.1016/0304-4076\(88\)90077-2](https://doi.org/10.1016/0304-4076(88)90077-2)
- Courchesne, E., Campbell, K., Solso, S., 2011. Brain growth across the life span in autism: age-specific changes in anatomical pathology. *Brain Res.* 1380, 138–45. <https://doi.org/10.1016/j.brainres.2010.09.101>

- Courchesne, E., Pierce, K., Schumann, C.M., Redcay, E., Buckwalter, J.A., Kennedy, D.P., Morgan, J., 2007. Mapping early brain development in autism. *Neuron* 56, 399–413.  
<https://doi.org/10.1016/j.neuron.2007.10.016>
- Dale, A.M., Fischl, B., Sereno, M.I., 1999. Cortical surface-based analysis. I. Segmentation and surface reconstruction. *Neuroimage* 9, 179–94. <https://doi.org/10.1006/nimg.1998.0395>
- Desikan, R.S., Ségonne, F., Fischl, B., Quinn, B.T., Dickerson, B.C., Blacker, D., Buckner, R.L., Dale, A.M., Maguire, R.P., Hyman, B.T., Albert, M.S., Killiany, R.J., 2006. An automated labeling system for subdividing the human cerebral cortex on MRI scans into gyral based regions of interest. *Neuroimage* 31, 968–980. <https://doi.org/10.1016/j.neuroimage.2006.01.021>
- Di Martino, A., Yan, C., Li, Q., Denio, E., Castellanos, F.X., Alaerts, K., Anderson, J.S., Assaf, M., Bookheimer, S.Y., Dapretto, M., Deen, B., Delmonte, S., Dinstein, I., Ertl-Wagner, B., Fair, D.A., Gallagher, L., Kennedy, D.P., Keown, C.L., Keyzers, C., Lainhart, J.E., Lord, C., Luna, B., Menon, V., Minshew, N.J., Monk, C.S., Mueller, S., Müller, R.-A.R.-A., Nebel, M.B., Nigg, J.T., O’Hearn, K., Pelphrey, K.A., Peltier, S.J., Rudie, J.D., Sunaert, S., Thioux, M., Tyszka, J.M., Uddin, L.Q., Verhoeven, J.S., Wenderoth, N., Wiggins, J.L., Mostofsky, S.H., Milham, M.P., 2014. The autism brain imaging data exchange: towards a large-scale evaluation of the intrinsic brain architecture in autism. *Mol. Psychiatry* 19, 659–667. <https://doi.org/10.1038/mp.2013.78>
- Ecker, C., 2016. The neuroanatomy of autism spectrum disorder: An overview of structural neuroimaging findings and their translatability to the clinical setting. *Autism* 1362361315627136. <https://doi.org/10.1177/1362361315627136>
- Ellegood, J., Markx, S., Lerch, J.P., Steadman, P.E., Genç, C., Provenzano, F., Kushner, S.A., Henkelman, R.M., Karayiorgou, M., Gogos, J.A., 2014. A highly specific pattern of volumetric brain changes due to 22q11.2 deletions in both mice and humans. *Mol. Psychiatry* 19, 6–6. <https://doi.org/10.1038/mp.2013.179>
- Fischl, B., Dale, A.M., 2000. Measuring the thickness of the human cerebral cortex from magnetic resonance images. *Proc. Natl. Acad. Sci.* 97, 11050–11055.  
<https://doi.org/10.1073/pnas.200033797>
- Georgiades, S., Bishop, S.L., Frazier, T., 2017. Editorial Perspective: Longitudinal research in autism - introducing the concept of “chronogeneity.” *J. Child Psychol. Psychiatry* 58, 634–636.  
<https://doi.org/10.1111/jcpp.12690>
- Geschwind, D.H., State, M.W., 2015. Gene hunting in autism spectrum disorder: on the path to precision medicine. *Lancet Neurol.* 14, 1109–1120. [https://doi.org/10.1016/S1474-4422\(15\)00044-7](https://doi.org/10.1016/S1474-4422(15)00044-7)
- Glasser, M.F., Coalson, T.S., Robinson, E.C., Hacker, C.D., Harwell, J., Yacoub, E., Ugurbil, K., Andersson, J., Beckmann, C.F., Jenkinson, M., Smith, S.M., Van Essen, D.C., 2016. A multi-modal parcellation of human cerebral cortex. *Nature* 536, 171–178.  
<https://doi.org/10.1038/nature18933>
- Haar, S., Berman, S., Behrmann, M., Dinstein, I., 2016. Anatomical Abnormalities in Autism? *Cereb. Cortex* 26, 1440–1452. <https://doi.org/10.1093/cercor/bhu242>
- Happé, F., Charlton, R.A., 2012. Aging in Autism Spectrum Disorders: A Mini-Review. *Gerontology*

- 58, 70–78. <https://doi.org/10.1159/000329720>
- Hennig, C., Liao, T.F., 2013. How to find an appropriate clustering for mixed-type variables with application to socio-economic stratification. *J. R. Stat. Soc. Ser. C (Applied Stat.* 62, 309–369. <https://doi.org/10.1111/j.1467-9876.2012.01066.x>
- Ho, D.E., Imai, K., King, G., Stuart, E.A., 2007. Matching as nonparametric preprocessing for reducing model dependence in parametric causal inference. *Polit. Anal.* 15, 199–236. <https://doi.org/10.1093/pan/mpi013>
- Hoffman, G.E., Schadt, E.E., 2016. variancePartition: interpreting drivers of variation in complex gene expression studies. *BMC Bioinformatics* 17, 483. <https://doi.org/10.1186/s12859-016-1323-z>
- Jiao, Y., Chen, R., Ke, X., Chu, K., Lu, Z., Herskovits, E., 2011. Predictive models of autism spectrum disorder based on brain regional cortical thickness. *Neuroimage* 50, 589–599. <https://doi.org/10.1016/j.neuroimage.2009.12.047>. Predictive
- Kapur, S., Phillips, A.G., Insel, T.R., 2012. Why has it taken so long for biological psychiatry to develop clinical tests and what to do about it? *Mol. Psychiatry* 17, 1174–1179. <https://doi.org/10.1038/mp.2012.105>
- Khundrakpam, B.S., Lewis, J.D., Kostopoulos, P., Carbonell, F., Evans, A.C., 2017. Cortical Thickness Abnormalities in Autism Spectrum Disorders Through Late Childhood , Adolescence , and Adulthood □: A Large-Scale MRI Study 1721–1731. <https://doi.org/10.1093/cercor/bhx038>
- Lai, M.-C., Lombardo, M. V., Auyeung, B., Chakrabarti, B., Baron-cohen, S., 2015. Sex/Gender Differences and Autism: Setting the Scene for Future Research. *J. Am. Acad. Child Adolesc. Psychiatry* 54, 11–24. <https://doi.org/10.1016/j.jaac.2014.10.003>
- Lai, M.-C., Lombardo, M. V., Baron-Cohen, S., 2014. Autism. *Lancet* 383, 896–910. [https://doi.org/10.1016/S0140-6736\(13\)61539-1](https://doi.org/10.1016/S0140-6736(13)61539-1)
- Lai, M.-C., Lombardo, M. V., Chakrabarti, B., Baron-Cohen, S., 2013. Subgrouping the Autism “Spectrum”: Reflections on DSM-5. *PLoS Biol.* 11, e1001544. <https://doi.org/10.1371/journal.pbio.1001544>
- Lombardo, M. V., Lai, M.-C., Baron-Cohen, S., 2018. Big data approaches to decomposing heterogeneity across the autism spectrum. *bioRxiv* 1–29. <https://doi.org/http://dx.doi.org/10.1101/278788>
- Lord, C., Bishop, S., Anderson, D., 2015. Developmental trajectories as autism phenotypes. *Am. J. Med. Genet. Part C Semin. Med. Genet.* 169, 198–208. <https://doi.org/10.1002/ajmg.c.31440>
- Loth, E., Charman, T., Mason, L., Tillmann, J., Jones, E.J.H., Wooldridge, C., Ahmad, J., Auyeung, B., Brogna, C., Ambrosino, S., Banaschewski, T., Baron-Cohen, S., Baumeister, S., Beckmann, C., Brammer, M., Brandeis, D., Bölte, S., Bourgeron, T., Bours, C., de Bruijn, Y., Chakrabarti, B., Crawley, D., Cornelissen, I., Acqua, F.D., Dumas, G., Durston, S., Ecker, C., Faulkner, J., Frouin, V., Garces, P., Goyard, D., Hayward, H., Ham, L.M., Hipp, J., Holt, R.J., Johnson, M.H., Isaksson, J., Kundu, P., Lai, M.-C., D’ardhuy, X.L., Lombardo, M. V., Lythgoe, D.J., Mandl, R., Meyer-Lindenberg, A., Moessnang, C., Mueller, N., O’Dwyer, L., Oldehinkel, M., Oranje, B., Pandina, G., Persico, A.M., Ruigrok, A.N. V., Ruggieri, B., Sabet, J., Sacco, R., Cáceres, A.S.J., Simonoff, E., Toro, R., Tost, H., Waldman, J., Williams, S.C.R., Zwiers, M.P., Spooren, W.,

- Murphy, D.G.M., Buitelaar, J.K., 2017. The EU-AIMS Longitudinal European Autism Project (LEAP): design and methodologies to identify and validate stratification biomarkers for autism spectrum disorders. *Mol. Autism* 8, 24. <https://doi.org/10.1186/s13229-017-0146-8>
- Maaten, L. van der, 2014. Accelerating t-SNE using Tree-Based Algorithms. *J. Mach. Learn. Res.* 15, 3221–3245.
- Marquand, A.F., Rezek, I., Buitelaar, J.K., Beckmann, C.F., 2016. Understanding Heterogeneity in Clinical Cohorts Using Normative Models: Beyond Case-Control Studies. *Biol. Psychiatry* 80, 552–561. <https://doi.org/10.1016/j.biopsych.2015.12.023>
- Mills, K.L., Goddings, A.-L., Herting, M.M., Meuwese, R., Blakemore, S.-J., Crone, E.A., Dahl, R.E., Guroglu, B., Raznahan, A., Sowell, E.R., Tamnes, C.K., 2016. Structural brain development between childhood and adulthood: Convergence across four longitudinal samples. *Neuroimage* 141, 273–281. <https://doi.org/10.1016/j.neuroimage.2016.07.044>
- Moradi, E., Khundrakpam, B., Lewis, J.D., Evans, A.C., 2017. NeuroImage Predicting symptom severity in autism spectrum disorder based on cortical thickness measures in agglomerative data. *Neuroimage* 144, 128–141. <https://doi.org/10.1016/j.neuroimage.2016.09.049>
- Raznahan, A., Lerch, J.P., Lee, N., Greenstein, D., Wallace, G.L., Stockman, M., Clasen, L., Shaw, P.W., Giedd, J.N., 2011a. Patterns of coordinated anatomical change in human cortical development: a longitudinal neuroimaging study of maturational coupling. *Neuron* 72, 873–84. <https://doi.org/10.1016/j.neuron.2011.09.028>
- Raznahan, A., Shaw, P., Lalonde, F., Stockman, M., Wallace, G.L., Greenstein, D., Clasen, L., Gogtay, N., Giedd, J.N., 2011b. How Does Your Cortex Grow? *J. Neurosci.* 31, 7174–7177. <https://doi.org/10.1523/JNEUROSCI.0054-11.2011>
- Romero-garcia, R., Atienza, M., Clemmensen, L.H., Cantero, J.L., 2012. Effects of network resolution on topological properties of human neocortex. *Neuroimage* 59, 3522–3532. <https://doi.org/10.1016/j.neuroimage.2011.10.086>
- Romero-Garcia, R., Warrier, V., Bullmore, E.T., Baron-Cohen, S., Bethlehem, R.A.I., 2018. Synaptic and transcriptionally downregulated genes are associated with cortical thickness differences in autism. *Mol. Psychiatry*. <https://doi.org/10.1038/s41380-018-0023-7>
- Rosen, A.F.G., Roalf, D.R., Ruparel, K., Blake, J., Seelaus, K., Villa, L.P., Ciric, R., Cook, P.A., Davatzikos, C., Elliott, M.A., Garcia de La Garza, A., Gennatas, E.D., Quarmley, M., Schmitt, J.E., Shinohara, R.T., Tisdall, M.D., Craddock, R.C., Gur, R.E., Gur, R.C., Satterthwaite, T.D., 2018. Quantitative assessment of structural image quality. *Neuroimage* 169, 407–418. <https://doi.org/10.1016/j.neuroimage.2017.12.059>
- Schumann, C.M., Bloss, C.S., Barnes, C.C., Wideman, G.M., Carper, R. a, Pierce, K., Hagler, D., Schork, N., Lord, C., Courchesne, E., Akshoomoff, N., 2010. Longitudinal MRI Study of Cortical Development through Early Childhood in Autism. *J. Neurosci.* 30, 4419–4427. <https://doi.org/10.1523/JNEUROSCI.5714-09.2010>
- Ségonne, F., Dale, A.M., Busa, E., Glessner, M., Salat, D., Hahn, H.K., Fischl, B., 2004. A hybrid approach to the skull stripping problem in MRI. *Neuroimage* 22, 1060–75. <https://doi.org/10.1016/j.neuroimage.2004.03.032>

- Smith, E., Thurm, A., Greenstein, D., Farmer, C., Swedo, S., Giedd, J.N., Raznahan, A., 2016. Cortical thickness change in autism during early childhood. *Hum. Brain Mapp.* 37, 2616–2629. <https://doi.org/10.1002/hbm.23195>
- van Rooij, D., Anagnostou, E., Arango, C., Auzias, G., Behrmann, M., Busatto, G.F., Calderoni, S., Daly, E.M., Deruelle, C., Di Martino, A., Dinstein, I., Duran, F.L.S., Durston, S., Ecker, C., Fair, D., Fedor, J., Fitzgerald, J., Freitag, C.M., Gallagher, L., Gori, I., Haar, S., Hoekstra, L., Jahanshad, N., Jalbrzikowski, M., Janssen, J., Lerch, J., Luna, B., Martinho, M.M., McGrath, J., Muratori, F., Murphy, C.M., Murphy, D.G.M., O’Hearn, K., Oranje, B., Parellada, M., Retico, A., Rossa, P., Rubia, K., Shook, D., Taylor, M., Thompson, P.M., Tosetti, M., Wallace, G.L., Zhou, F., Buitelaar, J.K., 2017. Cortical and Subcortical Brain Morphometry Differences Between Patients With Autism Spectrum Disorder and Healthy Individuals Across the Lifespan: Results From the ENIGMA ASD Working Group. *Am. J. Psychiatry appi.ajp.*2017.1. <https://doi.org/10.1176/appi.ajp.2017.17010100>
- Vissers, M.E., Cohen, M.X., Geurts, H.M., 2012. Brain connectivity and high functioning autism: a promising path of research that needs refined models, methodological convergence, and stronger behavioral links. *Neurosci. Biobehav. Rev.* 36, 604–25. <https://doi.org/10.1016/j.neubiorev.2011.09.003>
- Whitaker, K.J., Vértes, P.E., Romero-Garcia, R., Váša, F., Moutoussis, M., Prabhu, G., Weiskopf, N., Callaghan, M.F., Wagstyl, K., Rittman, T., Tait, R., Ooi, C., Suckling, J., Inkster, B., Fonagy, P., Dolan, R.J., Jones, P.B., Goodyer, I.M., Bullmore, E.T., 2016. Adolescence is associated with genomically patterned consolidation of the hubs of the human brain connectome. *Proc. Natl. Acad. Sci.* 113, 9105–9110. <https://doi.org/10.1073/pnas.1601745113>
- Zielinski, B. a., Prigge, M.B.D.D., Nielsen, J.A., Froehlich, A.L., Abildskov, T.J., Anderson, J.S., Fletcher, P.T., Zygmunt, K.M., Travers, B.G., Lange, N., Alexander, A.L.A., Bigler, E.D., Lainhart, J.E., 2014. Longitudinal changes in cortical thickness in autism and typical development. *Brain* 137, 1799–1812. <https://doi.org/10.1093/brain/awu083>
